# Supplementary material
Source: PubMed Central journal article supplement (PMC5330699)
Supplement: supp_the2016-0117_onco12014-sup-0001-suppinfo01.pdf [file supp_the2016-0117_onco12014-sup-0001-suppinfo01.pdf]

Supplemental Appendices for:  
Use of Targeted Agents and Chemotherapy Concurrent with Stereotactic or Whole Brain Radiotherapy for Cerebral Metastases of Solid Tumors  
Ann Hoeben

### **Supplemental Appendix A – Search Strategy**

#### PubMed + Medline

((*name systemic therapy*) AND (((brain metastasis) OR brain metastases) OR cerebral metastases) OR cerebral metastasis)) AND (((((((("Radiotherapy"[Mesh]) OR radiotherapy OR gamma knife surgery)) OR whole brain radiotherapy) OR WBRT) OR stereotactic radiotherapy) OR SRT) OR stereotactic radiosurgery) OR SRS)

#### Cochrane

((*name systemic therapy*) and (((brain metastasis) or brain metastases) or cerebral metastases) or cerebral metastasis)) and (((((((Radiotherapy or gamma knife surgery)) or whole brain radiotherapy) or WBRT) or stereotactic radiotherapy) or SRT) or stereotactic radiosurgery) or SRS)

#### Web Of Science

(((*name systemic therapy*) and (((brain metastasis) or brain metastases) or cerebral metastases) or cerebral metastasis)) and (((((((Radiotherapy) or gamma knife surgery) or whole brain radiotherapy) or WBRT) or stereotactic radiotherapy) or SRT) or stereotactic radiosurgery) or SRS))

Supplemental Appendices for:  
 Use of Targeted Agents and Chemotherapy Concurrent with Stereotactic or Whole Brain Radiotherapy for Cerebral Metastases of Solid Tumors  
 Ann Hoeben

**Supplemental Appendix B – Overview of trial characteristics<sup>1</sup>**

|                             | Trial type                  | N  | Primary tumor                                                   | Radiotherapy treatment                                                         | Systemic therapy dosage                                                                            | Primary study objective                                      | Secondary study objectives                                                  |
|-----------------------------|-----------------------------|----|-----------------------------------------------------------------|--------------------------------------------------------------------------------|----------------------------------------------------------------------------------------------------|--------------------------------------------------------------|-----------------------------------------------------------------------------|
| <u>Capecitabine</u>         |                             |    |                                                                 |                                                                                |                                                                                                    |                                                              |                                                                             |
| <b>Chargari et al 2009</b>  | Retrospective<br>Single-arm | 5  | Breast                                                          | WBRT (30 Gy in 10 fractions)                                                   | 1000mg/m <sup>2</sup> , BID,14 days                                                                | Radiographic response, toxicity, survival and local control. | -                                                                           |
| <b>Niravath et al 2014</b>  | Phase II<br>Single-arm      | 12 | Breast                                                          | WBRT (dose not reported)                                                       | 1000mg/m <sup>2</sup> , BID,14 days                                                                | PFS                                                          | -                                                                           |
| <u>Gemcitabine</u>          |                             |    |                                                                 |                                                                                |                                                                                                    |                                                              |                                                                             |
| <b>Maraveyas et al 2005</b> | Phase I                     | 25 | NSCLC,<br>Colorectal,<br>Breast, Renal,<br>Oesophageal          | WBRT (30 Gy in 10 fractions)                                                   | 25mg/m <sup>2</sup> weekly, 25-37.5-50.0, 62.5, 75mg/m <sup>2</sup> twice weekly                   | MTD                                                          | -                                                                           |
| <b>Huang et al 2007</b>     | Phase I                     | 16 | NSCLC                                                           | WBRT (37,5 Gy in 15 fractions)                                                 | 400mg/m <sup>2</sup> ; 500mg/m <sup>2</sup> ; 600mg/m <sup>2</sup> 700mg/m <sup>2</sup> day 1/8/15 | MTD                                                          | -                                                                           |
| <u>Cisplatin</u>            |                             |    |                                                                 |                                                                                |                                                                                                    |                                                              |                                                                             |
| <b>Stewart et al 1982</b>   |                             | 14 | Melanoma,<br>lung,<br>oropharyngeal<br>, thyroid,<br>testicular | WBRT (60 Gy in 7 weeks or 50 Gy followed by 15 Gy covering initial tumor site) | 40mg/m <sup>2</sup> weekly                                                                         | Researching radiosensitizing effect.                         | -                                                                           |
| <u>Carboplatin</u>          |                             |    |                                                                 |                                                                                |                                                                                                    |                                                              |                                                                             |
| <b>Guerrieri et al 2004</b> | Phase III<br>Dual-arm       | 42 | NSCLC                                                           | WBRT (20 Gy in 4 fractions)                                                    | 70mg/m <sup>2</sup> /day                                                                           | Survival                                                     | Objective response rate, symptom control, time to neurological progression, |

Supplemental Appendices for:  
 Use of Targeted Agents and Chemotherapy Concurrent with Stereotactic or Whole Brain Radiotherapy for Cerebral Metastases of Solid Tumors  
 Ann Hoeben

|                                             | Trial type    | N            | Primary tumor | Radiotherapy treatment                               | Systemic therapy dosage                                                                                                                                                                         | Primary study objective                           | Secondary study objectives |
|---------------------------------------------|---------------|--------------|---------------|------------------------------------------------------|-------------------------------------------------------------------------------------------------------------------------------------------------------------------------------------------------|---------------------------------------------------|----------------------------|
| <u>Cisplatin, Vinorelbine, Ifosfamide</u>   |               |              |               |                                                      |                                                                                                                                                                                                 |                                                   |                            |
| <b>Quantin et al 1999</b>                   | Phase II      | 23           | NSCLC         | WBRT (3 cycles 18 Gy in 10 fractions)                | Vinorelbine 30mg/m <sup>2</sup> day 1 and 8, Ifosfamide 1.5g/m <sup>2</sup> day 1-3, Cisplatin 100mg/m <sup>2</sup> day 2 (3 cycles).                                                           | Response rate and survival                        | Toxicity and compliance    |
| <b>Quantin et al 2010</b>                   | Phase II      | A:37<br>B:33 | NSCLC         | A+B: WBRT 3 cycles 18 Gy in 10 fractions             | A: Vinorelbine 30mg/m <sup>2</sup> day 1 and 8, Ifosfamide 1.5g/m <sup>2</sup> day 1-3, Cisplatin 100mg/m <sup>2</sup> day 2 (3 cycles).<br>B: Ifosfamide 3g/m <sup>2</sup> day 1-4 (3 cycles). | Response rate and safety profile                  | -                          |
| <u>Cisplatin, Vindisine, Mitomycine</u>     |               |              |               |                                                      |                                                                                                                                                                                                 |                                                   |                            |
| <b>Furuse et al 1997</b>                    | Phase II      | 33           | NSCLC         | WBRT (40 Gy in 20 fractions)                         | Cisplatin 100mg/m <sup>2</sup> day 1 and 29.<br>Vindisine 3mg/m <sup>2</sup> day 1, 8, 29, 39.<br>Mitomycine 8mg/m <sup>2</sup> day 1 and 29.                                                   | Technical feasibility toxicity and tumor response | -                          |
| <u>Pemetrexed, Cisplatin or carboplatin</u> |               |              |               |                                                      |                                                                                                                                                                                                 |                                                   |                            |
| <b>Chargari et al 2013</b>                  | Retrospective | 43           | NSCLC         | WBRT (30 Gy in 10 fractions or 20 Gy in 5 fractions) | Pemetrexed 500mg/m <sup>2</sup> as monotherapy or combined with cisplatin 75mg/m <sup>2</sup> or carboplatin 75mg/m <sup>2</sup> (median 4 cycles).                                             | Radiographic response, survival and toxicity      | -                          |
| <b>Dinglin et al 2013</b>                   | Phase II      | 42           | NSCLC         | WBRT (30 Gy in 10 fractions)                         | Pemetrexed 500mg/m <sup>2</sup> , cisplatin 75mg/m <sup>2</sup> (maximum 6 cycles).                                                                                                             | Efficacy and tolerability                         | -                          |
| <u>Cisplatin, Vinorelbine</u>               |               |              |               |                                                      |                                                                                                                                                                                                 |                                                   |                            |
| <b>Robinet et al 2001</b>                   | Phase III     | A: 86        | NSCLC         | A: no RT.                                            | Cisplatin 100mg/m <sup>2</sup> day 1                                                                                                                                                            | OS and PFS                                        | Toxicity                   |

Supplemental Appendices for:  
Use of Targeted Agents and Chemotherapy Concurrent with Stereotactic or Whole Brain Radiotherapy for Cerebral Metastases of Solid Tumors

Ann Hoeben

|                                                                                       | Trial type  | N     | Primary tumor                                        | Radiotherapy treatment             | Systemic therapy dosage                                                                                                                                                                      | Primary study objective                      | Secondary study objectives                                         |
|---------------------------------------------------------------------------------------|-------------|-------|------------------------------------------------------|------------------------------------|----------------------------------------------------------------------------------------------------------------------------------------------------------------------------------------------|----------------------------------------------|--------------------------------------------------------------------|
|                                                                                       |             | B: 35 |                                                      | B: WBRT (30 Gy in 10 fractions)    | (median 2 cycles),<br>Vinorelbine 30mg/m <sup>2</sup> day 1, 8, 15, 22 (median 3 cycles).                                                                                                    |                                              |                                                                    |
| <u>Cisplatin, Etoposide</u><br><b>Chen et al 2012</b>                                 | Phase II    | 36    | SCLC                                                 | WBRT (30 Gy in 10 fractions)       | Cisplatin 80mg/m <sup>2</sup> day 1, Etoposide 100mg/m <sup>2</sup> day 1-3 (3 cycles).                                                                                                      | Response, survival and toxicity              | -                                                                  |
| <u>Cisplatin, Paclitaxel + Vinorelbine or Gemcitabine</u><br><b>Cortes et al 2003</b> | Phase II    | 26    | NSCLC                                                | WBRT (30 Gy in 10 fractions)       | Cisplatin 120mg/m <sup>2</sup> day 1, Paclitaxel 135mg/m <sup>2</sup> day 1, Vinorelbine 30mg/m <sup>2</sup> day 1 and 15 or gemcitabine 800mg/m <sup>2</sup> day 1 and 8 (median 3 cycles). | Feasibility, activity and toxicity           | -                                                                  |
| <u>Sunitinib</u><br><b>Chung et al 2012</b>                                           | Phase I     | 7     | Renal, lung, breast, cervix and tongue.              | SRS (15, 18 or 21 Gy)              | 25mg/day or 37.5 mg/day                                                                                                                                                                      | Toxicity and tumor response                  | -                                                                  |
| <b>Wuthrick et al 2011</b>                                                            | Phase Ib    | 12    | Melanoma, NSCLC, HNSCC, adenoid cystic and chordoma. | Both (median dose 37.5 Gy)         | 37.5mg/day                                                                                                                                                                                   | Toxicity and safety profile                  | Radiographic tumor response at 1 month and urine biomarker changes |
| <u>Sunitinib and/or Sorafenib</u><br><b>Arneson et al 2014</b>                        | Phase I     | 11    | Not specified.                                       | SRS (dose not reported)            | Sorafenib 400mg OD or BID.                                                                                                                                                                   | Safety, tolerability, maximum tolerated dose |                                                                    |
| <b>Stahler et al 2010</b>                                                             | Case-series | 106   | Renal cell                                           | SRS (median dose 20 Gy per lesion) | Sunitinib: 50mg OD, 4weeks on, 2 weeks off.                                                                                                                                                  | Local control                                | Toxicity and OS                                                    |

Supplemental Appendices for:  
 Use of Targeted Agents and Chemotherapy Concurrent with Stereotactic or Whole Brain Radiotherapy for Cerebral Metastases of Solid Tumors  
 Ann Hoeben

|                            | Trial type               | N   | Primary tumor       | Radiotherapy treatment                                       | Systemic therapy dosage                                | Primary study objective                                                  | Secondary study objectives                                                                     |
|----------------------------|--------------------------|-----|---------------------|--------------------------------------------------------------|--------------------------------------------------------|--------------------------------------------------------------------------|------------------------------------------------------------------------------------------------|
|                            |                          |     |                     |                                                              | Sorafenib: 400mg, BID                                  |                                                                          |                                                                                                |
| <b>Erlotinib</b>           |                          |     |                     |                                                              |                                                        |                                                                          |                                                                                                |
| <b>Lind et al 2008</b>     | Phase I                  | 11  | NSCLC               | WBRT (30 Gy in 10 fractions)                                 | 100mg/d & 150mg/d                                      | Toxicity                                                                 | OS, interval to progression, intracranial and extracranial tumor response                      |
| <b>Zhuang et. al. 2013</b> | Prospective Dual-arm     | 54  | Lung adenocarcinoma | WBRT (30 Gy in 10 fractions)                                 | 150mg OD                                               | Intracranial objective response rate and local progression-free survival | Toxicity, progression-free survival and OS                                                     |
| <b>Welsh et al 2013</b>    | Phase II Single-arm      | 40  | NSCLC               | WBRT (2.5 Gy per day 5 days per week to 35 Gy)               | 150mg OD                                               | OS                                                                       | Radiologic response and safety                                                                 |
| <b>Olmez et al 2010</b>    | Retrospective Single-arm | 8   | NSCLC               | WBRT (range 35-40 Gy)                                        | 150mg OD                                               | Clinical response of BM, of extracranial disease and toxicity            |                                                                                                |
| <b>Cai et al. 2013</b>     | Retrospective Dual-arm   | 157 | NSCLC               | WBRT (range 29.73-41.42 Gy)                                  | 150mg OD erlotinib (n=43) OR 250mg OD gefitinib (n=22) | Adverse reactions and clinical effect                                    |                                                                                                |
| <b>Lee et. al. 2014</b>    | Phase II Dual-arm        | 80  | NSCLC               | WBRT (20 Gy in 5 fractions)                                  | 150mg OD                                               | Neurological progression-free survival                                   | QoL, adverse events                                                                            |
| <b>Lee et. al. 2012</b>    | Retrospective Dual-arm   | 43  | NSCLC               | WBRT (30-40 Gy) some local boosts to tumor sites to 50-60 Gy | Unknown                                                | Radiological progression-free survival; overall survival                 |                                                                                                |
| <b>Sperduto et al 2012</b> | Phase III Dual-arm       | 41  | NSCLC               | Both 37.5 Gy WBRT, afterwards SRS in 24, 18 or 15 Gy)        | 150mg/day                                              | OS                                                                       | Time to CNS progression, performance status at 6 months, steroid dependence and cause of death |
| <b>Gefitinib</b>           |                          |     |                     |                                                              |                                                        |                                                                          |                                                                                                |
| <b>Wang et. al. 2014</b>   | Phase II Single-arm      | 37  | NSCLC               | WBRT 50 Gy                                                   | 250mg OD                                               | Efficacy and safety                                                      |                                                                                                |

Supplemental Appendices for:  
 Use of Targeted Agents and Chemotherapy Concurrent with Stereotactic or Whole Brain Radiotherapy for Cerebral Metastases of Solid Tumors  
 Ann Hoeben

|                                                 | Trial type                  | N   | Primary tumor  | Radiotherapy treatment                   | Systemic therapy dosage                                   | Primary study objective               | Secondary study objectives                                                                                                                                                              |
|-------------------------------------------------|-----------------------------|-----|----------------|------------------------------------------|-----------------------------------------------------------|---------------------------------------|-----------------------------------------------------------------------------------------------------------------------------------------------------------------------------------------|
| <b>Zeng et al 2012</b>                          | Retrospective<br>Single-arm | 90  | NSCLC          | WBRT (40 Gy in 20 fractions)             | 250mg OD                                                  | Efficacy                              |                                                                                                                                                                                         |
| <b>Ma et al 2008</b>                            | Phase II<br>Single-arm      | 21  | NSCLC          | WBRT (40 Gy in 20 fractions)             | 250mg OD                                                  | Tumor response and QoL                | Toxicity and survival                                                                                                                                                                   |
| <b>Cai et al. 2013</b>                          | Retrospective<br>Dual-arm   | 157 | NSCLC          | WBRT (range 29.73-41.42 Gy)              | 150mg OD erlotinib (n=43)<br>OR 250mg OD gefitinib (n=22) | Adverse reactions and clinical effect |                                                                                                                                                                                         |
| <b>Pesce et. al. 2012</b>                       | Phase II<br>Single-arm      | 16  | NSCLC          | WBRT (30 Gy in 10 fractions)             | 250 mg OD                                                 | OS                                    | QoL and cognitive function                                                                                                                                                              |
| <u>Lapatinib</u><br><b>Lin et al. 2013</b>      | Phase I<br>Single-arm       | 35  | Breast (HER2+) | WBRT (37.5 Gy in 15 fractions)           | Maximum 1500mg OD                                         | MTD of concurrent lapatinib with WBRT | Volumetric CNS objective response (ORR), non-CNS ORR, progression-free survival, OS, site of first progression, proportion of patients progression free at 6 months and cause of death. |
| <u>Vemurafenib</u><br><b>Schulze et al 2014</b> | Case-reports                | 2   | Melanoma       | WBRT (30 Gy in 10 fractions)             | 960mg BID                                                 | -                                     | -                                                                                                                                                                                       |
| <b>Liebner et al 2014</b>                       | Case-reports                | 2   | Melanoma       | Variable                                 | 960mg BID                                                 | -                                     | -                                                                                                                                                                                       |
| <b>Narayana et al 2013</b>                      | Retrospective<br>Single-arm | 12  | Melanoma       | Both (median dose SRS 20 Gy, WBRT 30 Gy) | 960mg BID                                                 | Safety and efficacy                   |                                                                                                                                                                                         |
| <b>Ahmed et. al. 2015</b>                       | Retrospective<br>Single-arm | 24  | Melanoma       | SRS (median 24 Gy)                       | 960mgBID                                                  | Local failure                         | Distant brain failure, OS, toxicity                                                                                                                                                     |
| <b>Gaudy-Marqueste et. al. 2014</b>             | Retrospective<br>Single-arm | 24  | Melanoma       | Gamma-knife radiosurgery (40-56 Gy)      | Not defined.                                              | Safety                                | -                                                                                                                                                                                       |
| <b>Rompoti et. al. 2013</b>                     | Case-reports                | 4   | Melanoma       | WBRT or SRS (24-35 Gy)                   | 960 mg BID                                                | -                                     | -                                                                                                                                                                                       |

Supplemental Appendices for:  
Use of Targeted Agents and Chemotherapy Concurrent with Stereotactic or Whole Brain Radiotherapy for Cerebral Metastases of Solid Tumors

Ann Hoeben

|                             | Trial type                  | N  | Primary tumor       | Radiotherapy treatment                    | Systemic therapy dosage                       | Primary study objective                                                            | Secondary study objectives                            |
|-----------------------------|-----------------------------|----|---------------------|-------------------------------------------|-----------------------------------------------|------------------------------------------------------------------------------------|-------------------------------------------------------|
| <u>Ipilimumab</u>           |                             |    |                     |                                           |                                               |                                                                                    |                                                       |
| <b>Silk et. al. 2013</b>    | Retrospective<br>Dual-arm   | 70 | Melanoma            | WBRT (30-37.5 Gy) or SRS (14-24 Gy)       | 3mg/kg every 3 weeks                          | OS, time to progression in the brain, proportion of patients with a response to RT | -                                                     |
| <b>Mathew et al 2013</b>    | Retrospective<br>Duel-arm   | 58 | Melanoma            | SRS (median dose 20 Gy)                   | 3 or 10mg/kg every 3 weeks                    | Local control, OS, freedom from new brain metastasis                               | -                                                     |
| <b>Gerber et. al 2014</b>   | Retrospective<br>Single-arm | 13 | Melanoma            | WBRT (median dose 3000 cGy)               | 3mg/kg, 10mg/kg                               | Safety and efficacy                                                                | -                                                     |
| <b>Tazi et. al. 2014</b>    | Retrospective<br>Single-arm | 10 | Melanoma            | SRS (doses not reported)                  | Not reported                                  | OS time, time from first ipilimumab to death from any cause                        | -                                                     |
| <b>Kiess et. al. 2015</b>   | Retrospective<br>Single-arm | 46 | Melanoma            | SRS (median dose 29 Gy, range 15-24 Gy)   | 3mg/kg (54%) or 10 mg/kg (46%) every 3 weeks. | OS, local control and regional control. Safety.                                    | -                                                     |
| <u>Trastuzumab</u>          |                             |    |                     |                                           |                                               |                                                                                    |                                                       |
| <b>Chargari et al 2010</b>  | Retrospective<br>Single-arm | 31 | Breast (HER2+)      | WBRT (30 Gy in 10 daily fractions)        | 2mg/kg weekly or 6mg/kg every 3 weeks         | Efficacy and acute toxicity                                                        | -                                                     |
| <b>Carlson et. al. 2014</b> | Case-reports                | 4  | Breast (HER2+)      | SRS (16-24 Gy)                            | Not reported                                  | -                                                                                  | -                                                     |
| <u>Bevacizumab</u>          |                             |    |                     |                                           |                                               |                                                                                    |                                                       |
| <b>Lèvy et. al. 2014</b>    | Phase I                     | 19 | Breast, lung, ovary | WBRT (30 Gy in 10 fractions) from day 15. | 15 mg/kg on day 1, 15 and 29.                 | Identify the recommended phase II dose.                                            | Assess treatment-related parameters of BM regression. |

<sup>1</sup> NSCLC: non-small cell lung carcinoma, SCLC: small-cell lung carcinoma, HNSCC: head-neck squamous cell carcinoma, HER2: human endothelial growth factor receptor 2, WBRT: whole-brain radiotherapy, SRS: stereotactic radiosurgery, OD: once daily, BID: twice daily, PFS: progression-free survival, MTD: maximum tolerated dose, OS: overall survival, BM: brain metastases, QoL: quality of life, RT: radiotherapy, CNS: central nervous system.

Supplemental Appendices for:  
Use of Targeted Agents and Chemotherapy Concurrent with Stereotactic or Whole Brain Radiotherapy for Cerebral Metastases of Solid Tumors  
Ann Hoeben

**Supplemental Appendix C – Working mechanisms and targeted receptors of reviewed systemic therapies**

| <b>Systemic Therapy</b>                   | <b>Working mechanism<sup>1</sup></b>                                                                                                                                                                                                            |
|-------------------------------------------|-------------------------------------------------------------------------------------------------------------------------------------------------------------------------------------------------------------------------------------------------|
| Platinum analogs (carboplatin; cisplatin) | Covalent binding to DNA with preferential binding to specific subsite of guanine and adenosine. After binding to DNA it produces cross-links which results in inhibition of DNA synthesis and functions as well as inhibitors of transcription. |
| Taxanes (docetaxel; paclitaxel)           | Bind to microtubules, enhancing tubuline polymerization and in this way inhibiting microtubule depolymerization, resulting in G2/M arrest, leading to inhibition of mitosis and cell division.                                                  |
| Gemcitabine                               | Replaces a nucleic acid (cytidine) during DNA replication which arrests tumor growth and results in apoptosis. Also inhibits RNR due to which DNA replication and repair arrests and apoptosis is induced.                                      |
| Sunitinib                                 | Inhibitor of: PDGFR-alpha, PDGFR-beta, VEGFR1, VEGFR2, VEGFR3, and other tyrosine kinases receptors (KIT, FLT-3, CSF-1R and RET)                                                                                                                |
| Sorafenib                                 | Inhibitor of: intracellular kinases located in both the tumour cell (c-Raf, V600E b-Raf, KIT and Fit3) and in the tumour vasculature (c-Raf, VEGFR2, VEGFR3 and PDGFR-beta)                                                                     |
| Erlotinib                                 | Inhibitor of EGFR which results in the inhibition of growth pathways induced by EGFR stimulation.                                                                                                                                               |
| Gefitinib                                 | Inhibitor of EGFR which results in the inhibition of growth pathways induced by EGFR stimulation.                                                                                                                                               |
| Lapatinib                                 | Inhibitor of HER1 and HER2 which results in the inhibition of the cell proliferation stimulated by these receptors.                                                                                                                             |
| Vemurafenib                               | Inhibitor of BRAF V600e which results in cell death by interrupting intercellular pathways.                                                                                                                                                     |
| Ipilimumab                                | Inhibitor of CTLA-4 which results in the activation of the cytotoxic T-cell response to tumor cells.                                                                                                                                            |
| Trastuzumab                               | Antibody of the HER2/neu receptor which results in the inhibition of the cell proliferation stimulated by HER2.                                                                                                                                 |
| Bevacizumab                               | Antibody of the VEGF-A receptor which slows the growth of angiogenesis.                                                                                                                                                                         |

<sup>1</sup> DNA: deoxyribonucleic acid, RNR: ribonucleotide reductase; PDGFR: platelet-derived growth factor receptors; VEGFR vascular endothelial growth factor receptor; KIT: KIT proto-oncogene receptor tyrosine kinase; FLT-3: fms-related tyrosine kinase 3; CSF1R: colony stimulating factor 1 receptor; RET: rearranged during transfection; c-RAF: c-rapidly accelerated fibrosarcoma; b-RAF: b-rapidly accelerated fibrosarcoma.; Fit3: facilitator of iron transport 3; EGFR: endothelial growth factor receptor; HER: human epidermal growth factor receptor; CTLA-4: cytotoxic T-lymphocyte associated protein 4; VEGF: vascular endothelial growth factor
